# Supplementary material for: Hijacking exosome biogenesis: viral glycoproteins as modular scaffolds for engineering functionalized extracellular vesicles
Source: Royal Society of Chemistry journal article supplement (doi:10.1039/d5nr03704b), 2026-01-01
Supplement: d5nr03704b1.pdf [file d5nr03704b1.pdf]

## A Co-localization of scaffolds with CD63

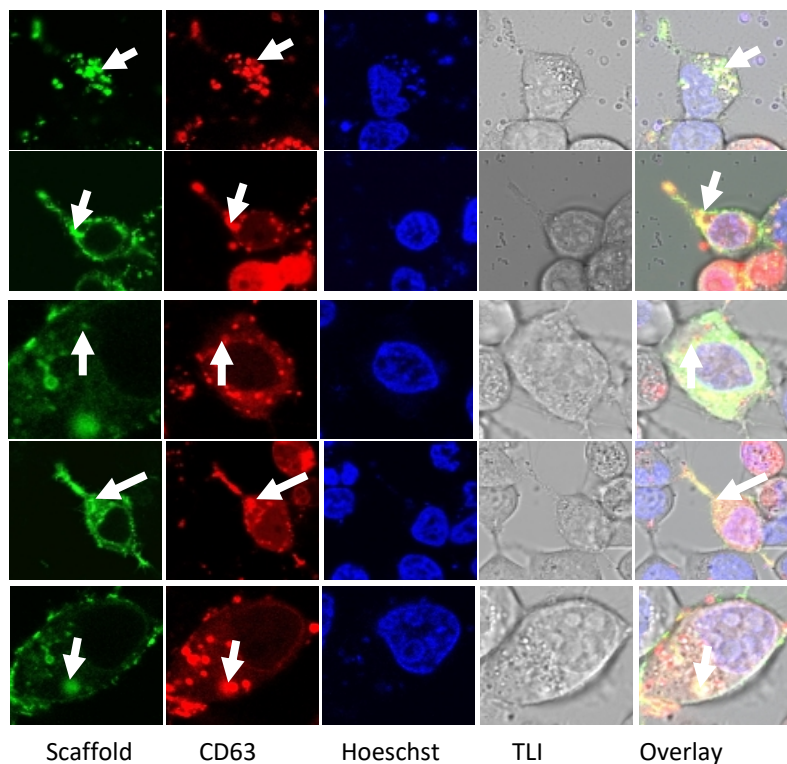

## B Co-efficiency of co-efficiency

|             | Scaffolds   | CD63  |       |       |                  |
|-------------|-------------|-------|-------|-------|------------------|
|             |             | 24 hr | 48 hr | 72 hr | Mean $\pm$ SD    |
| RD114A      | VSVG        | 0.884 | 0.809 | 0.927 | $0.873 \pm 0.06$ |
|             | RD114A      | 0.949 | 0.595 | 0.739 | $0.761 \pm 0.18$ |
| CoV-1 Spike | CoV-1 Spike | 0.823 | 0.832 | 0.882 | $0.846 \pm 0.03$ |
|             | CoV-2 Spike | 0.925 | 0.774 | 0.688 | $0.796 \pm 0.12$ |
| HSV-gpB     | HSV-B       | 0.899 | 0.81  | 0.844 | $0.851 \pm 0.04$ |

**Figure S1. Co-localization of viral GP scaffolds with the exosome marker CD63.**

(A) Representative fluorescence and transmitted light images (TLI) of 293T cells co-transfected with viral envelope GP-GFP fusion constructs and CD63-RFP. Following transfection, images were recorded for three consecutive days and representative images at 72 hours (hr) with Hoeschst stain are shown. Fluorescence signals reveal co-localization of GP-GFP scaffolds (green) with CD63-RFP (red), indicating their association with exosomal or multivesicular body (MVB) structures. Arrows indicate endosomal, exosomal, or MVB structures. Scale bars: 10  $\mu$ m. Arrows indicate the co-localization of GP scaffolds and CD63.

(B) Co-localization efficiencies for different scaffolds were analyzed using ImageJ and are presented as mean  $\pm$  SD using images recorded at 24, 48, and 72 hr following transfection.

A Co-localization of scaffolds with XPACK-RFP

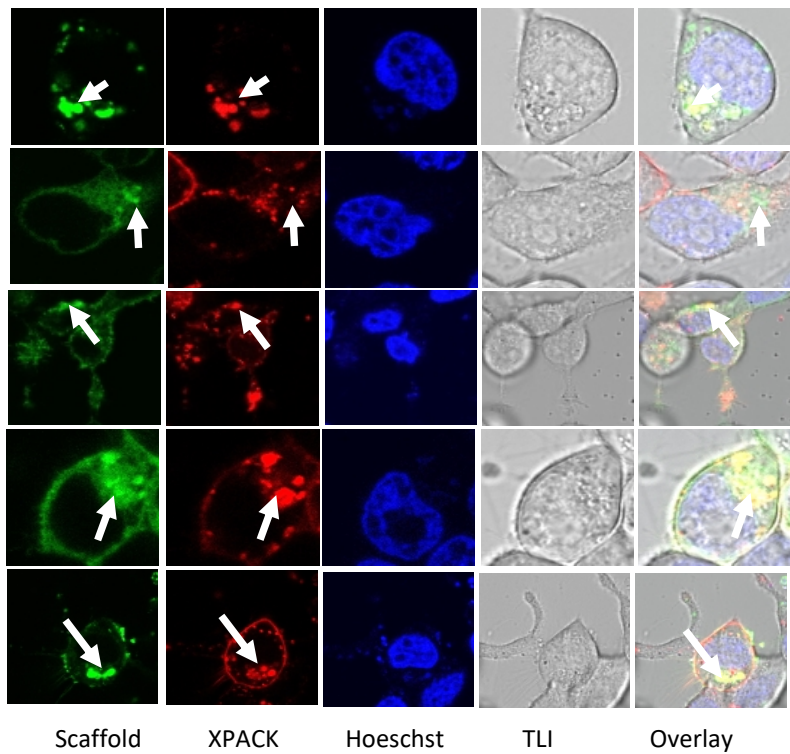

B Co-efficiency of colocalization

|           | Scaffolds   | XPACK-RFP |       |       |                  |
|-----------|-------------|-----------|-------|-------|------------------|
|           |             | 24 hr     | 48 hr | 72 hr | Mean $\pm$ SD    |
| RD114A    | VSVG        | 0.479     | 0.856 | 0.922 | 0.752 $\pm$ 0.24 |
|           | RD114A      | 0.897     | 0.799 | 0.777 | 0.824 $\pm$ 0.06 |
| Covid-1 S | CoV-1 Spike | 0.745     | 0.824 | 0.718 | 0.762 $\pm$ 0.06 |
|           | CoV-2 Spike | 0.806     | 0.845 | 0.944 | 0.865 $\pm$ 0.07 |
| HSV-b     | HSV-B       | 0.803     | 0.722 | 0.659 | 0.728 $\pm$ 0.07 |

**Figure S2. Co-localization of GP-GFP scaffolds with the exosome marker XPACK.**

(A) Representative fluorescence and transmitted light images (TLI) of 293T cells co-transfected with viral envelope GP-GFP fusion constructs and XPACK-RFP. Images were recorded for three consecutive days post-transfection. Representative images at 72 hours (hr) are shown. Fluorescence signals reveal co-localization of GP-GFP scaffolds (green) with XPACK-RFP (red), indicating their association with exosomal or multivesicular body (MVB) structures. Arrows indicate endosomal, exosomal, or MVB structures. Scale bars: 10  $\mu$ m.

(B) Co-localization efficiencies of GP scaffolds with XPACK were analyzed using ImageJ. The results are presented as mean  $\pm$  SD of images recorded at three different time points (24, 48, and 72 hr).

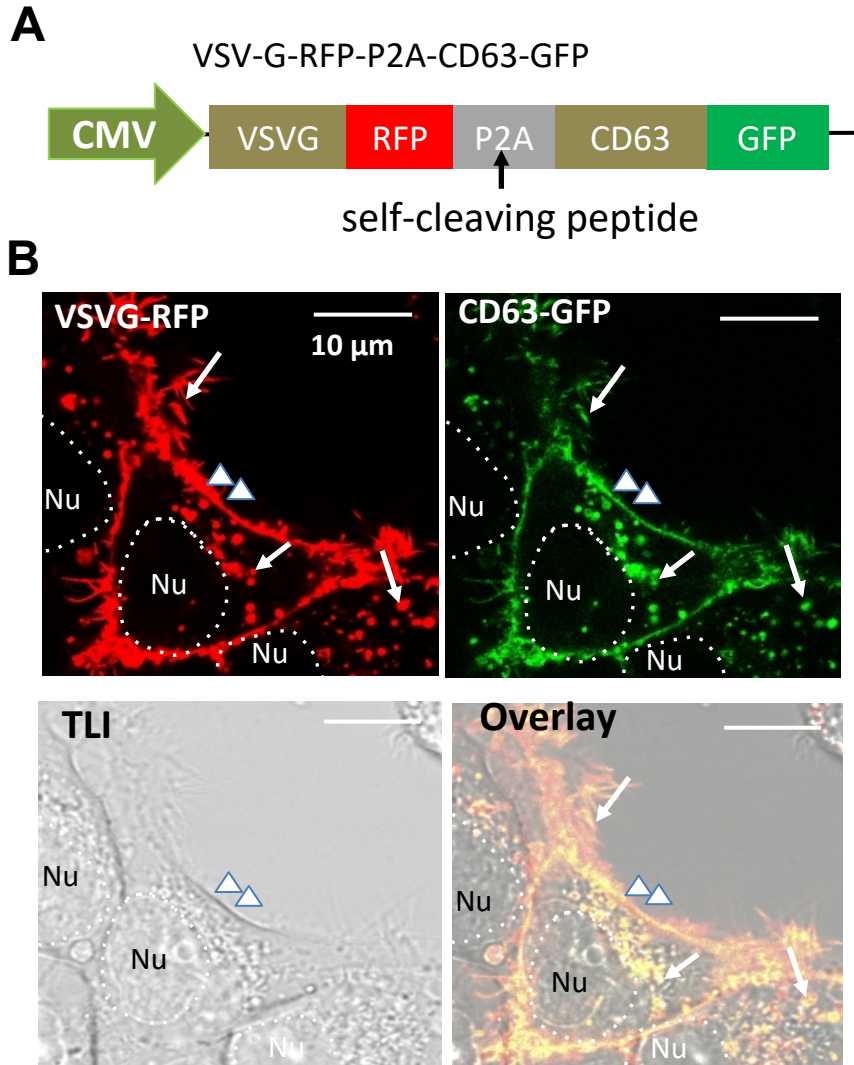

**Figure S3. Co-localization of VSVG-RFP with the exosome marker CD63-GFP using a bicistronic expression cassette**

(A) Schematic representation of the chimeric fusion construct encoding VSVG-RFP and CD63-GFP, linked by a self-cleaving peptide (P2A). (B) Co-localization analysis of VSVG-RFP with CD63-GFP. Fluorescence and transmitted light images (TLI) of 293T cells were recorded 48 hours post-transfection. VSVG-RFP (red) and CD63-GFP (green) fluorescence signals show strong co-localization, indicating their association with exosomal or multivesicular body (MVB) structures. ImageJ analysis quantified a co-localization coefficient of 0.876, supporting a robust association. Arrows highlight endosomal, exosomal, or MVB structures. Dashed lines indicate the nucleus (Nu). Scale bars: 10  $\mu$ m.

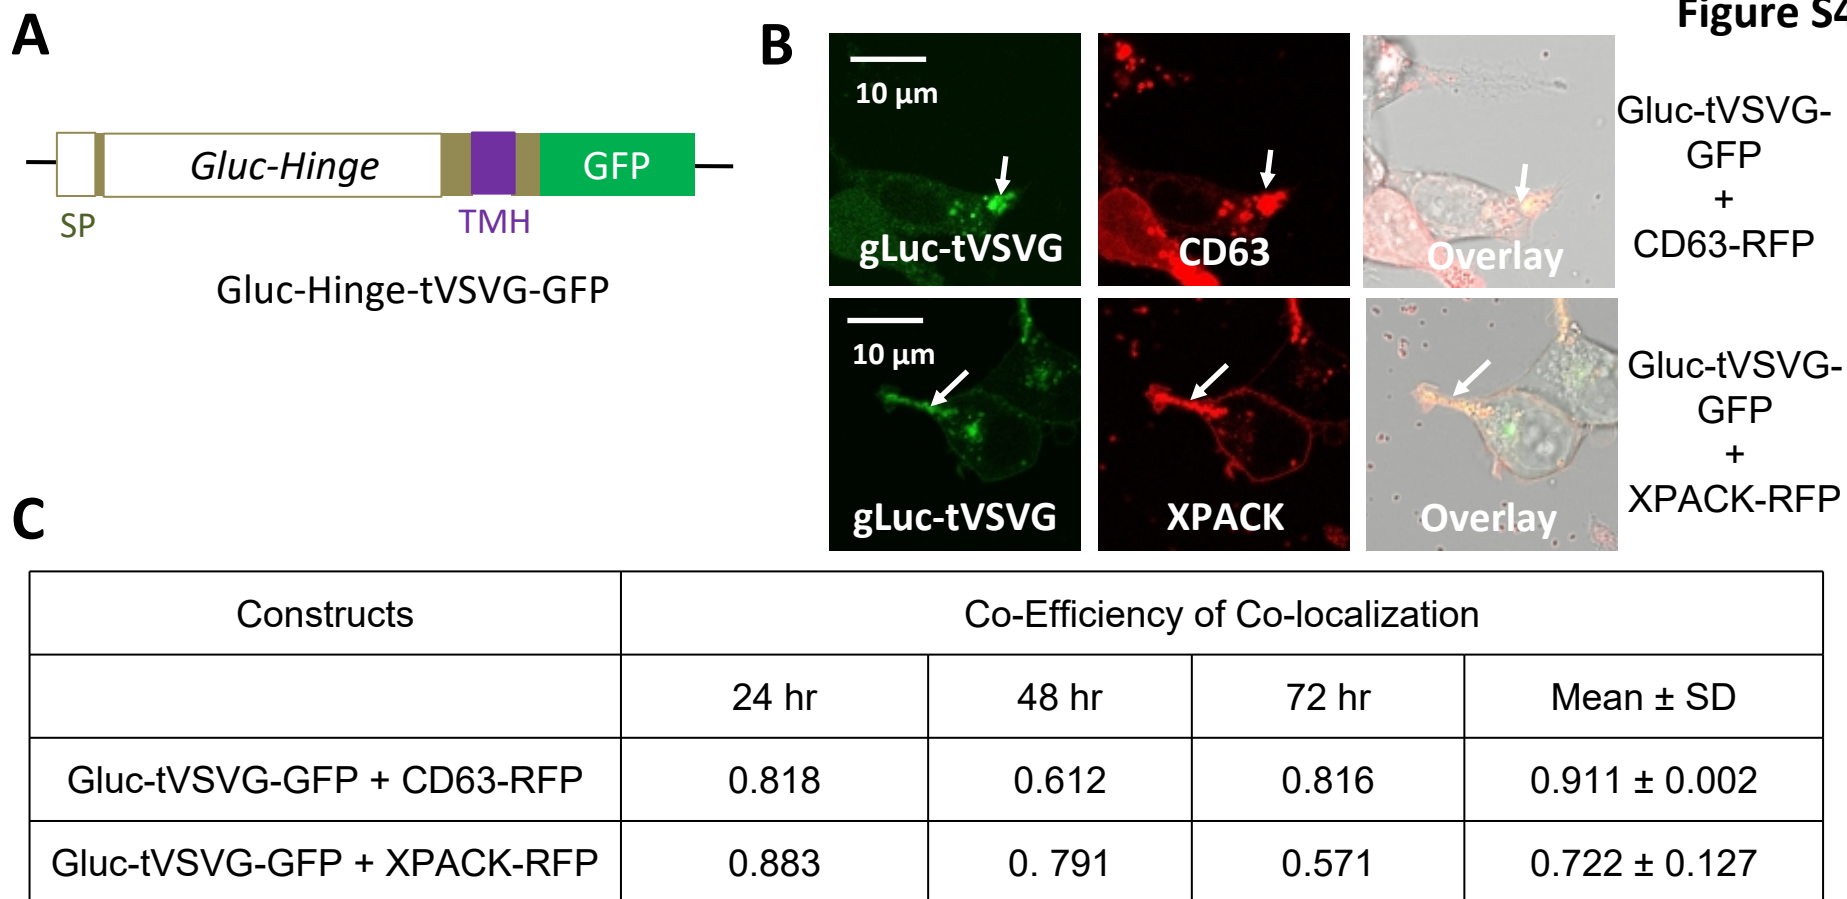

**Figure S4. Co-localization of truncated VSVG (tVSVG)–tagged with gLuc-Hinge-GFP and exosomal markers CD63 and XPACK.** (A) Schematic of the Gluc-Hinge–tVSVG–GFP construct. The reporter includes a Gaussia luciferase (gLuc) and CD8 hinge domain fused to the transmembrane helix (TMH) and cytoplasmic tail of VSVG, followed by GFP. (B) Confocal microscopy of 293T cells transfected with gLuc-Hinge-tVSVG-GFP, either alone or in combination with exosomal markers CD63-RFP (top) or XPACK-RFP (bottom). Gluc-tVSVG-GFP localized to intracellular puncta (arrows), and merged images show strong co-localization with CD63 or XPACK. Transmitted light image (TLI) and overlays are shown. Scale bars, 10  $\mu$ m. (C) Quantitative analysis of co-localization efficiency at 24, 48, and 72 hours post-transfection. gLuc-tVSVG-GFP co-localized with CD63-RFP (mean  $r = 0.911 \pm 0.002$ ) and XPACK-RFP (mean  $r = 0.722 \pm 0.127$ ). Data represent mean  $\pm$  SD from three time points ( $n=3$ ).



**Figure S5**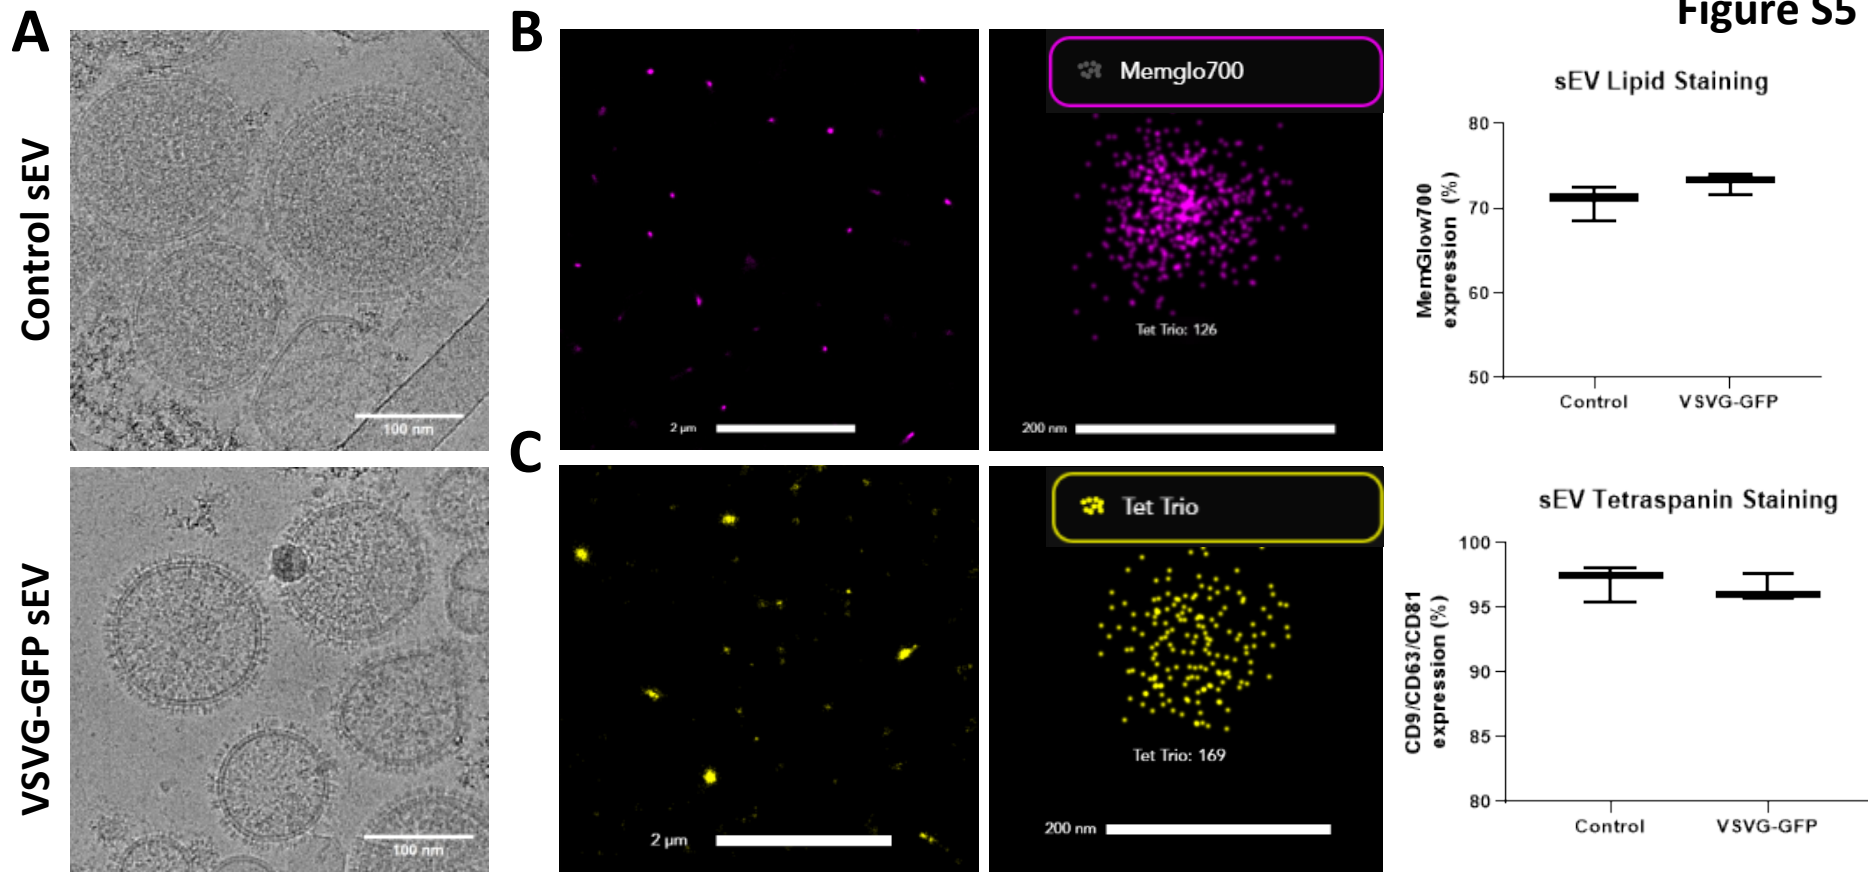

**Figure S5. Biophysical, Chemical and Immunologic characterization of isolated sEVs. (A)**

Representative cryogenic electron microscopy images of control sEVs and VSVG-GFP sEVs, taken at 45,000x magnification. Scale bars represent 100 nm. **(B)** Super-resolution microscopy visualization of control sEVs labeled with lipophilic membrane dye MemGlow700. Lipid-stained sEV clusters are shown in wide view with a 2  $\mu$ m scale bar and at the single EV scale with a 200 nm scale bar. Quantification of MemGlow700+ sEV clusters are shown in the box and whisker plot on the right. Data represent mean  $\pm$  SD from three fields of view (n=3). **(C)** Control sEVs stained for CD9, CD63, and/or CD81 tetraspanins with pan-tetraspanin antibodies. Quantification of MemGlow700+ sEV clusters are shown in the box and whisker plot on the right. Data represent mean  $\pm$  SD from three fields of view (n=3).

**Table S1. Co-efficiency of co-localization of ectodomain-deleted viral envelope glycoproteins with the exosome markers of CD63 and XPACK**

| Constructs                   | Co-Efficiency of Colocalization |       |       |                   |
|------------------------------|---------------------------------|-------|-------|-------------------|
|                              | 24 hr                           | 48 hr | 72 hr | Mean $\pm$ SD     |
| HSV-dgpB-GFP + CD63-RFP      | 0.913                           | 0.911 | 0.909 | 0.911 $\pm$ 0.002 |
| HSV-dgpB- + XPACK-RFP        | 0.644                           | 0.869 | 0.653 | 0.722 $\pm$ 0.127 |
| CoV-1 dSpike-GFP + CD63-RFP  | 0.756                           | 0.732 | 0.631 | 0.706 $\pm$ 0.066 |
| CoV-1 dSpike-GFP + XPACK-RFP | 0.573                           | 0.537 | 0.356 | 0.489 $\pm$ 0.116 |

Note: Co-localization co-efficiency of viral envelope glycoproteins (HSV-dgpB or CoV-1 dSpike) tagged with GFP and exosomal markers (CD63 or XPACK) tagged with RFP at 24, 48, and 72 hours (hr). Values represent mean  $\pm$  SD from three time points (n = 3).
